# Supplementary material for: Thermally controlled dual-mode display media with red-green-blue coloration and fluorescence via energy transfer between emission materials and leuco dyes
Source: Royal Society of Chemistry journal article supplement (doi:10.1039/c6tc01027j), 2016-01-01

## **Supplementary information**

### **Thermally controlled dual-mode display media with red-green-blue coloration and fluorescence via energy transfer between emission materials and leuco dyes**

**Kouki Ogasawara<sup>1</sup>, Kazuki Nakamura<sup>1,2\*</sup> and Norihisa Kobayashi<sup>1,2\*</sup>**

<sup>1</sup>Department of Image and Materials Science, Graduate School of Advanced Integration Science,  
Chiba University

<sup>2</sup> Molecular Chirality Research Center, Chiba University  
koban@faculty.chiba-u.jp

#### **Analytical data for prepared PU18**

<sup>1</sup>H NMR (400 MHz, DMSO):  $\delta$  = 8.92 (s, 1H, -OH), 8.00 (s, 1H, Ph-NH-), 7.12 (d,  $J$  = 8.8 Hz, 2H), 6.61 (d,  $J$  = 8.8 Hz, 2H), 5.92 (t,  $J$  = 5.7 Hz, 1H, -NH-CH<sub>2</sub>-), 3.02 (dd,  $J$  = 6.5 Hz, 2H, -NH-CH<sub>2</sub>-), 1.38 (dd,  $J$  = 6.5 Hz, 2H, -NH-CH<sub>2</sub>-CH<sub>2</sub>-), 1.23 (br, 30H), 0.85 (t,  $J$  = 6.8 Hz, 3H, -CH<sub>3</sub>). EA: Found. C 74.13%, H 11.02%, N 6.85%; Calcd. for C<sub>25</sub>H<sub>44</sub>N<sub>2</sub>O<sub>2</sub>: C 74.21%, H 10.96%, N 6.92%. White powder.

**Fig. S1** Schematic drawing of coloration reaction of DEBN, Yellow 1, Blue-220, and Cyan-6.

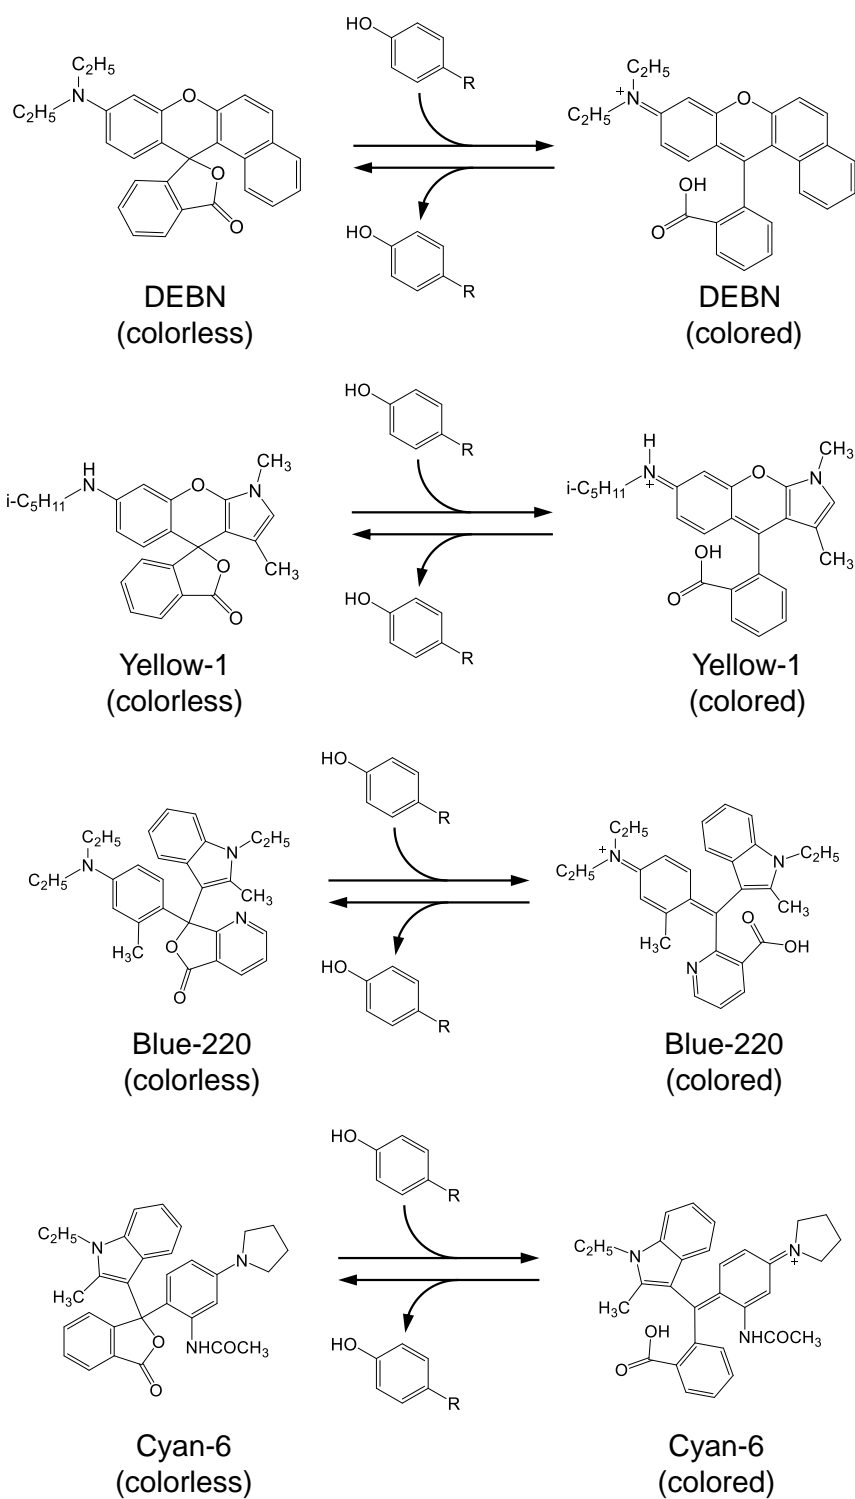

**Fig. S2** DSC curves of binder polymer (PEMA) and developer molecules (PU18), obtained at a heating rate 10 °C/min.

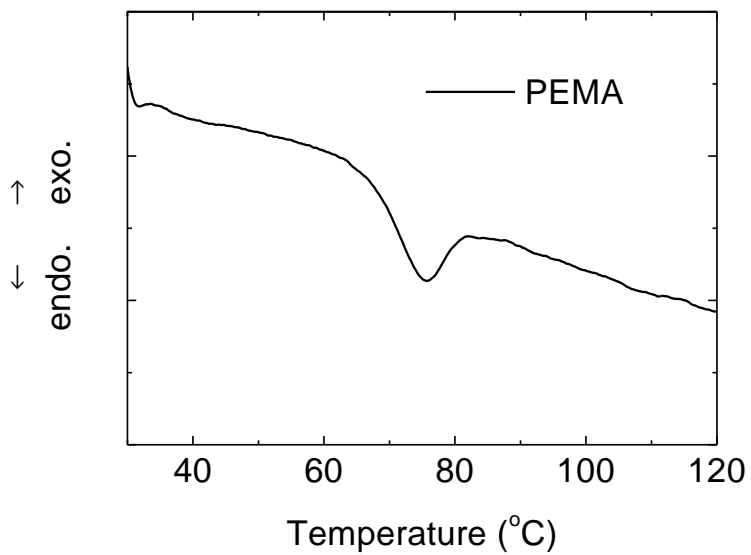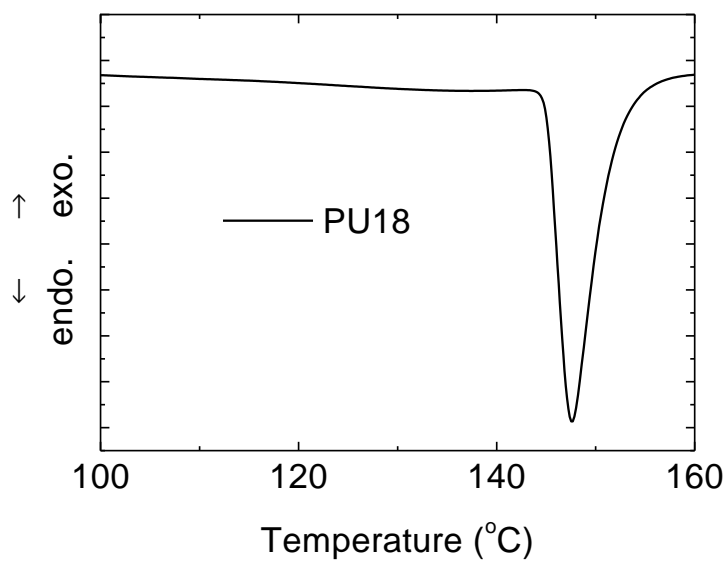

**Fig. S3** Emission decay curves of the red film in the colored state (red line) and the transparent state (black line).

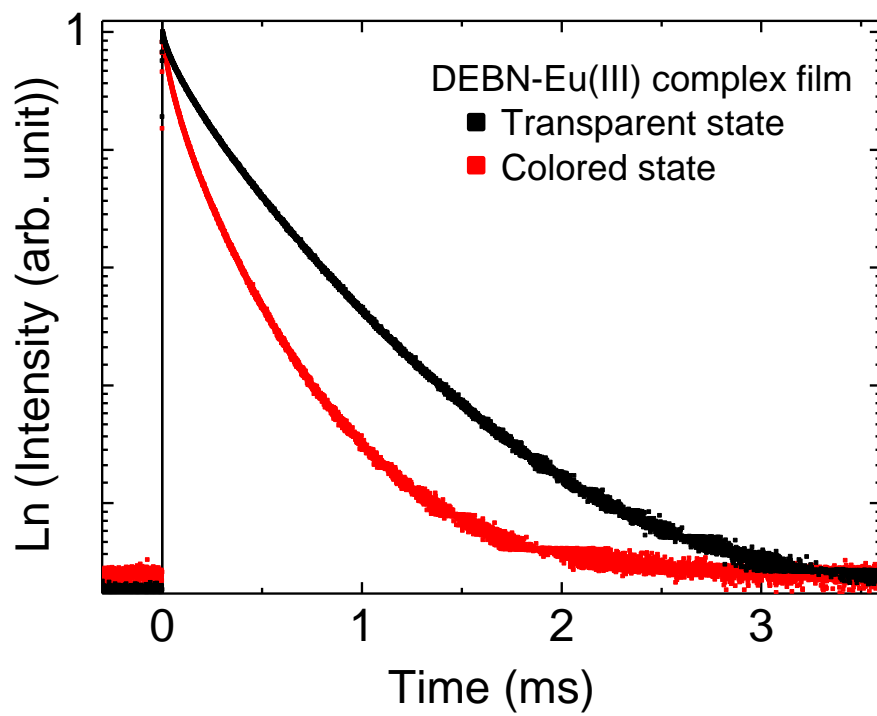

**Fig. S4** Temperature dependence of the emission intensity at 613 nm of the PEMA film containing only Eu(TTA)<sub>3</sub>phen.

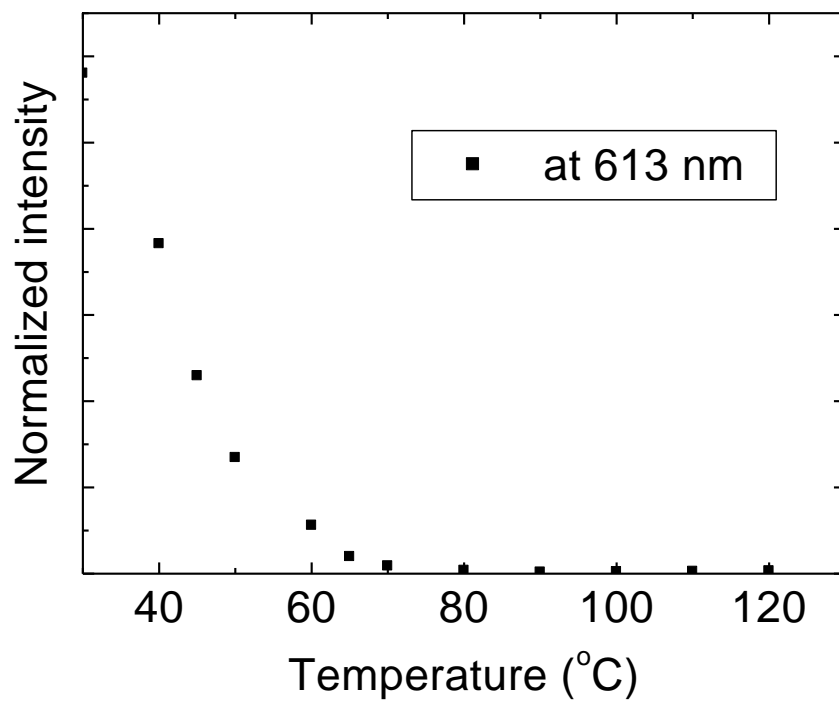

Supplement: c6tc01027j1.pdf [file c6tc01027j1.pdf]
